# Supplementary material for: Rumphellaoic Acid A, a Novel Sesquiterpenoid from the Formosan Gorgonian Coral Rumphella antipathies
Source: PubMed Central journal article supplement (PMC4278205; doi:10.3390/md12125856), 2014-12-04
Supplement: marinedrugs-12-05856-s001.pdf [file marinedrugs-12-05856-s001.pdf]

# Supplementary Information

Figure S1.  $^1\text{H}$  NMR spectrum (400 MHz) of compound **1** in  $\text{CDCl}_3$ .

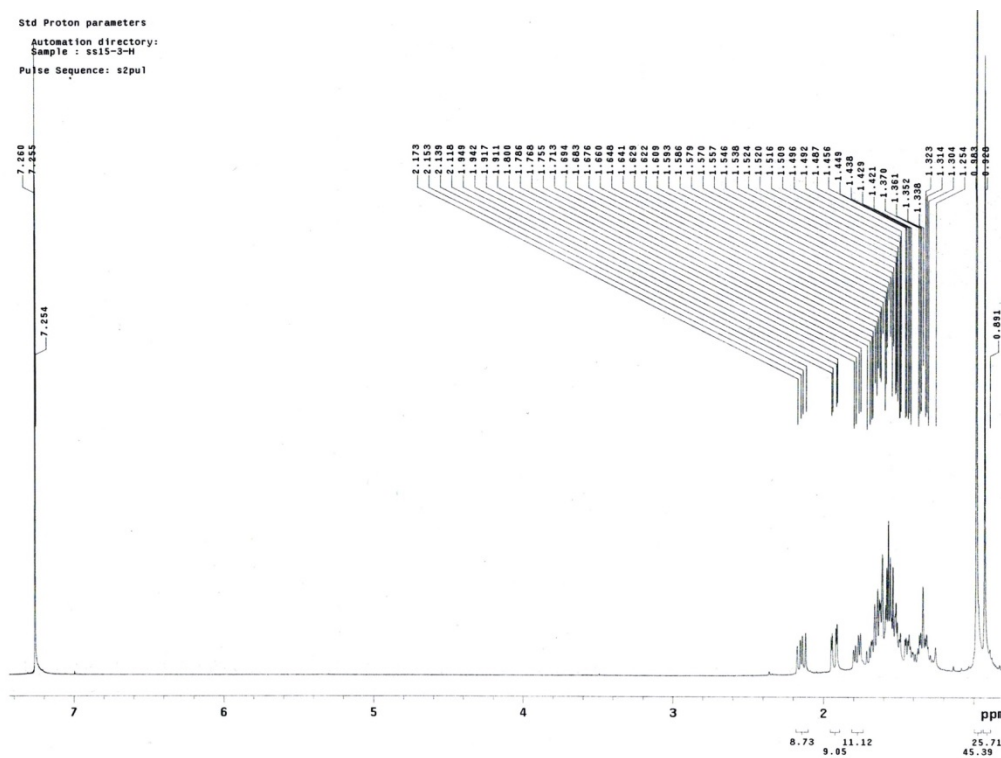

Figure S2.  $^{13}\text{C}$  NMR spectrum (100 MHz) of compound **1** in  $\text{CDCl}_3$ .

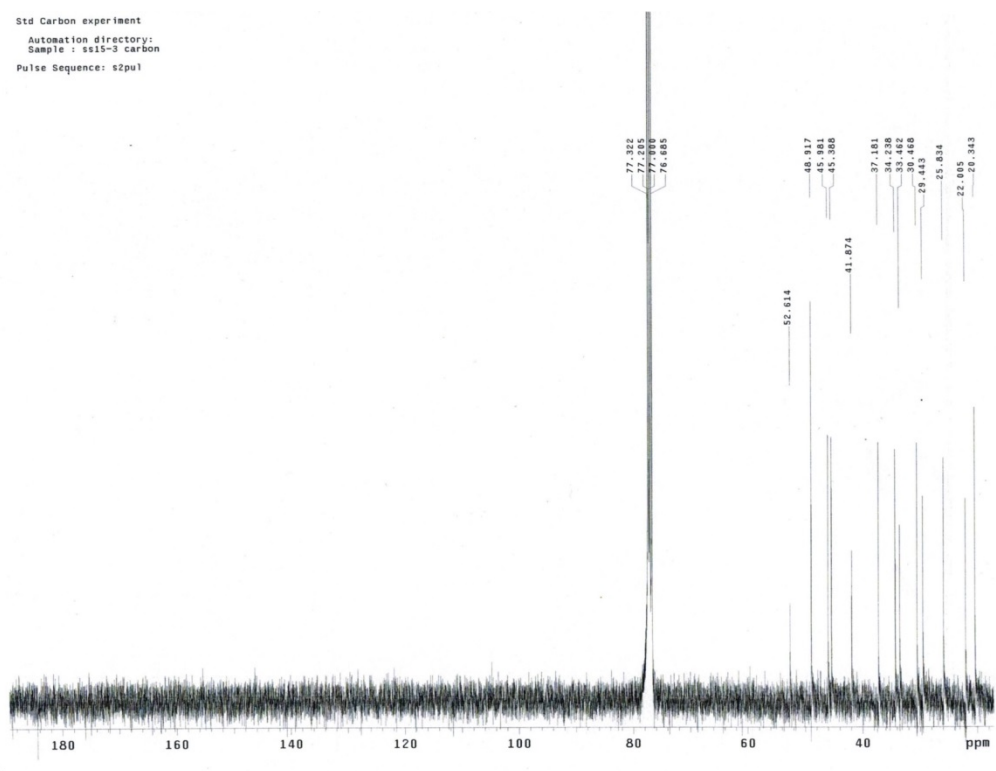

**Figure S3.** HMQC spectrum (400 MHz) of compound **1** in CDCl<sub>3</sub>.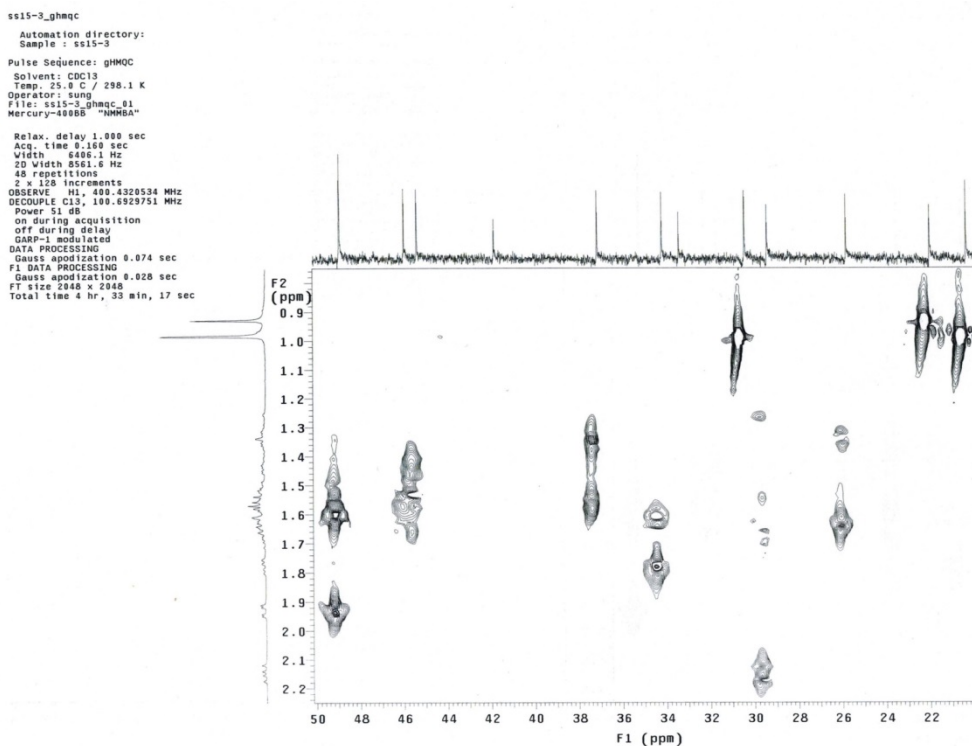**Figure S4.** HMBC spectrum (400 MHz) of compound **1** in CDCl<sub>3</sub>.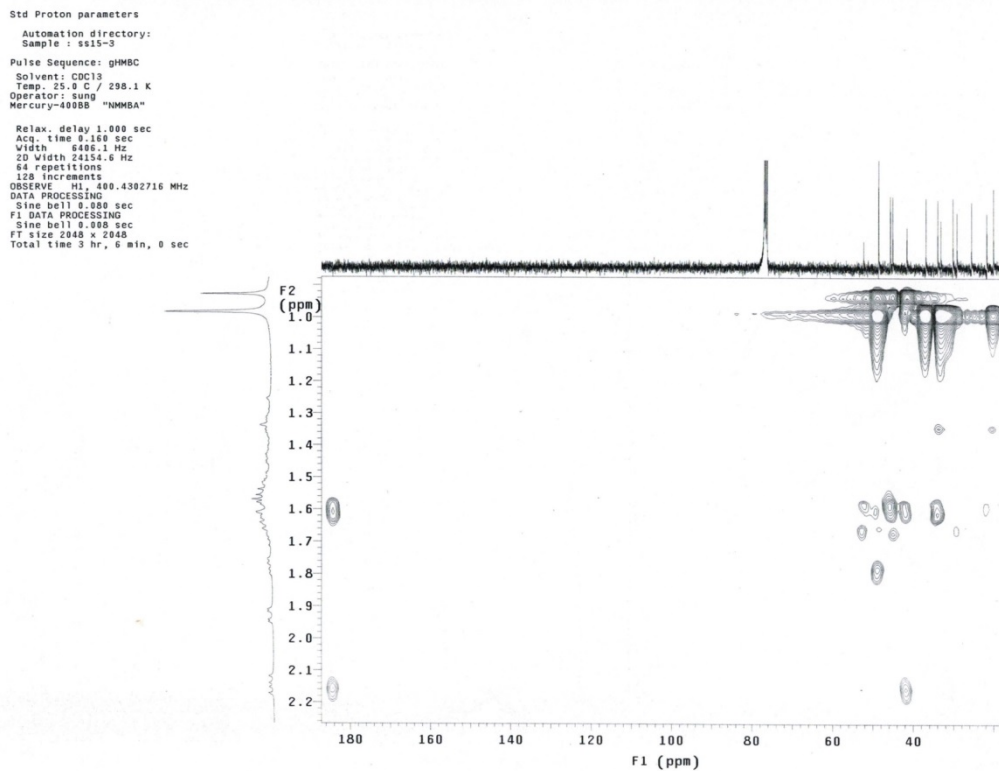

**Figure S5.** HMBC spectrum (400 MHz) of compound **1** in CDCl<sub>3</sub>.

Std Proton parameters  
Automation directory:  
Sample : ss15-3  
Pulse Sequence: gHMBC  
Solvent: CDCl3  
Temp: 25.0 C / 298.1 K  
Operator: sung  
Mercury-400BB "NMMA"  
Relax. delay 1.000 sec  
Acq. time 0.160 sec  
Width 6406.1 Hz  
2D Width 8561.6 Hz  
95 repetitions  
128 increments  
OBSERVE H1, 400.4320534 MHz  
DATA PROCESSING  
Sine bell 0.080 sec  
F1 DATA PROCESSING  
Sine bell 0.007 sec  
FT size 2048 x 2048  
Total time 4 hr, 39 min, 33 sec

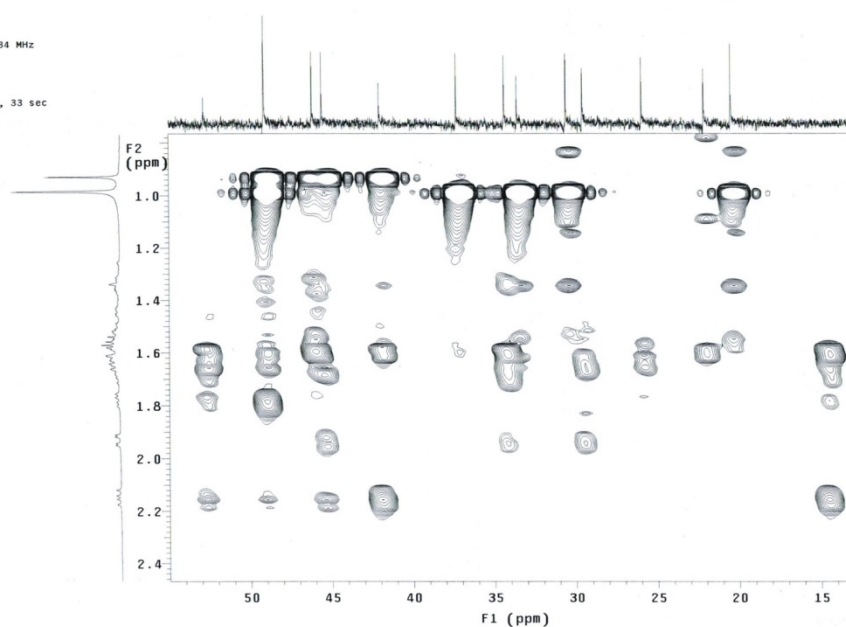**Figure S6.** COSY spectrum (400 MHz) of compound **1** in CDCl<sub>3</sub>.

Std Proton parameters  
Automation directory:  
Sample : ss15-3  
Pulse Sequence: gCOSY  
Solvent: CDCl3  
Temp: 25.0 C / 298.1 K  
Operator: sung  
Mercury-400BB "NMMA"  
Relax. delay 1.000 sec  
Acq. time 0.160 sec  
Width 6406.1 Hz  
2D Width 6406.1 Hz  
32 repetitions  
128 increments  
OBSERVE H1, 400.4320534 MHz  
DATA PROCESSING  
Sq. sine bell 0.080 sec  
F1 DATA PROCESSING  
Sq. sine bell 0.020 sec  
FT size 2048 x 2048  
Total time 1 hr, 28 min, 48 sec

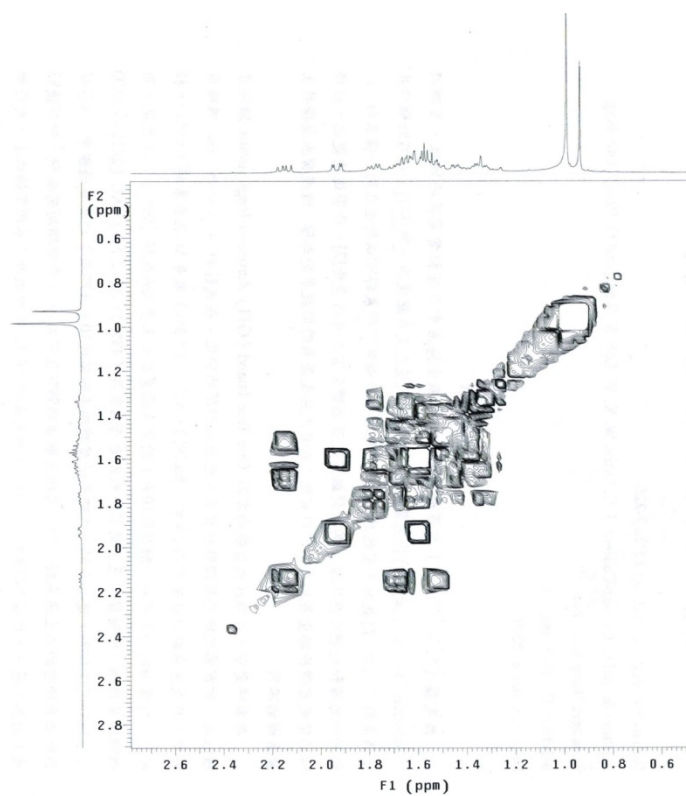

**Figure S7.** NOESY spectrum (400 MHz) of compound **1** in CDCl<sub>3</sub>.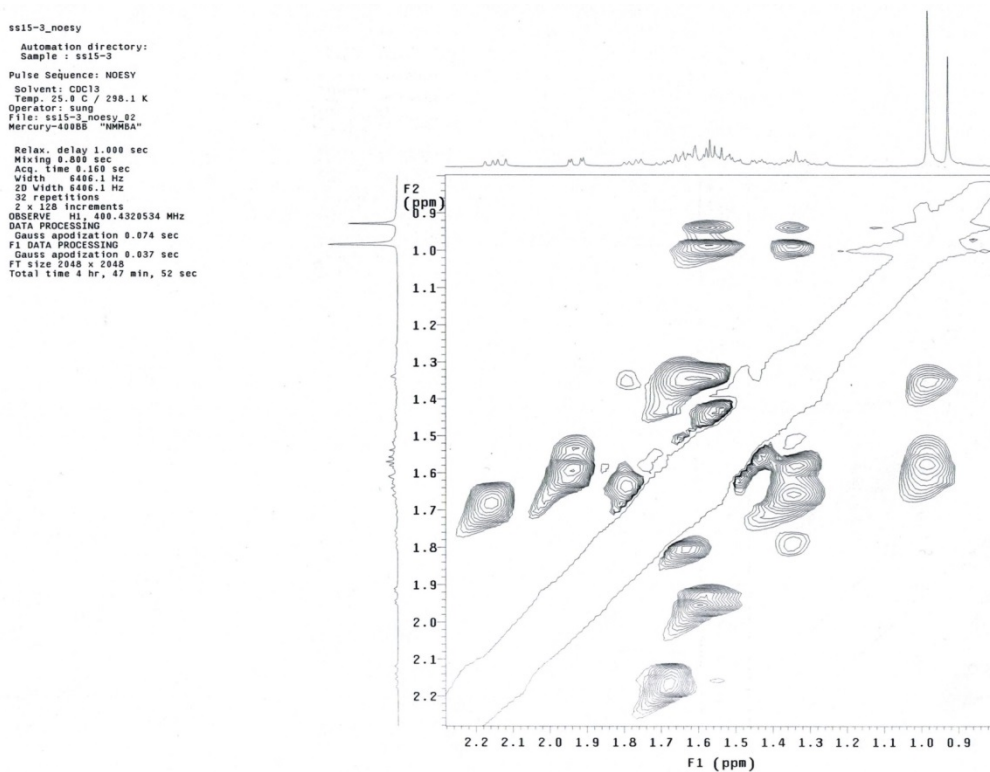

© 2014 by the authors; licensee MDPI, Basel, Switzerland. This article is an open access article distributed under the terms and conditions of the Creative Commons Attribution license (<http://creativecommons.org/licenses/by/4.0/>).
